# Supplementary material for: 532- and 52-symmetric Au helicoids synthesized through controlled seed twinning and aspect ratio
Source: Royal Society of Chemistry journal article supplement (doi:10.1039/d4nr03731f), 2025-01-01
Supplement: d4nr03731f1.pdf [file d4nr03731f1.pdf]

Supplementary Information  
**532- and 52-Symmetric Au Helicoids Synthesized  
Through Controlled Seed Twinning and Aspect  
Ratio**

Jack S. Googasian, Maxwell P. Perkins, Jun Chen, and Sara E. Skrabalak\*

Department of Chemistry, Indiana University – Bloomington, 800 E. Kirkwood Ave.,  
Bloomington, IN 47405, USA.

\*Corresponding author: [sskrabal@indiana.edu](mailto:sskrabal@indiana.edu)

## S.1 Supporting Figures

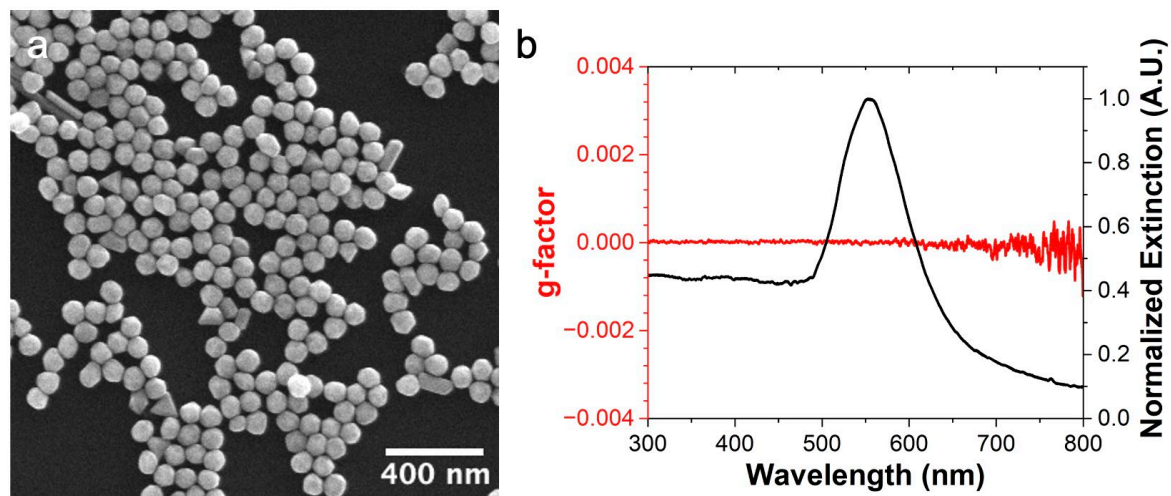

**Figure S1.** a) SEM image of icosahedral seeds for 532-helicoid synthesis. b) Graph of experimental UV-visible g-factor spectra *versus* wavelength for the icosahedral seeds.

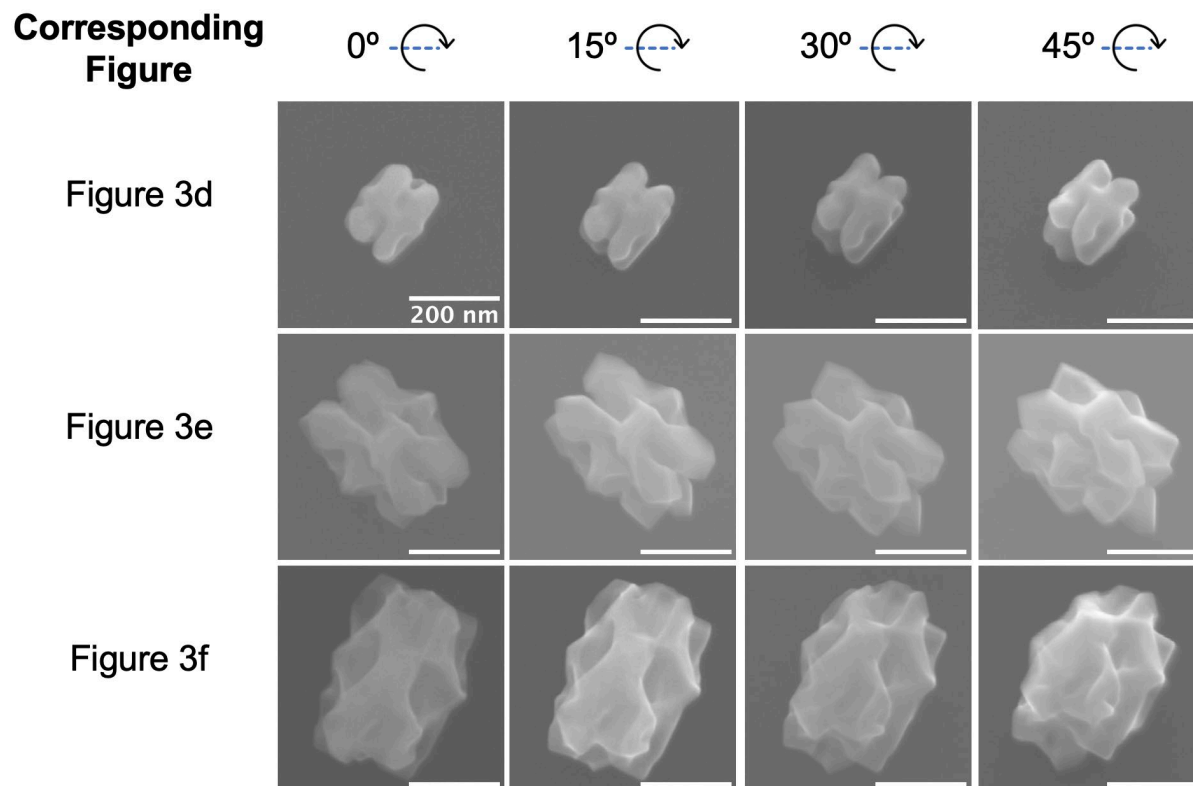

**Figure S2.** SEM images of 52-symmetric helicoids tilted from 0-45°. Rows correspond to samples in Figure 3d-f, respectively. Scale bars: 200 nm.

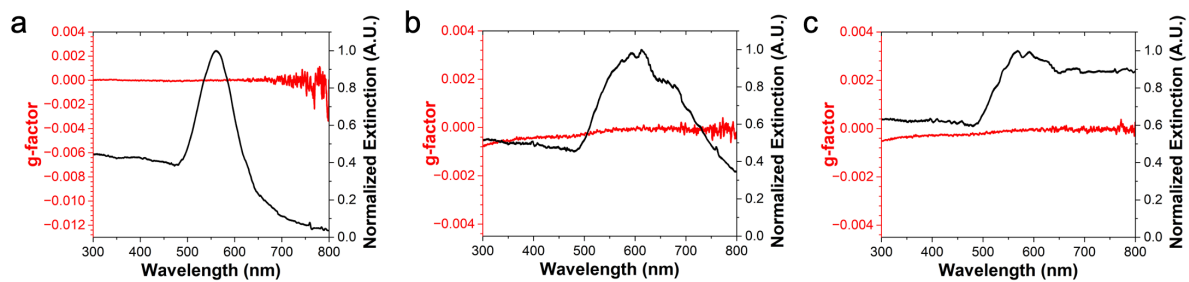

**Figure S3.** Experimental optical spectra for the large pentatwinned seeds in **Figure 3a-c**, respectively.

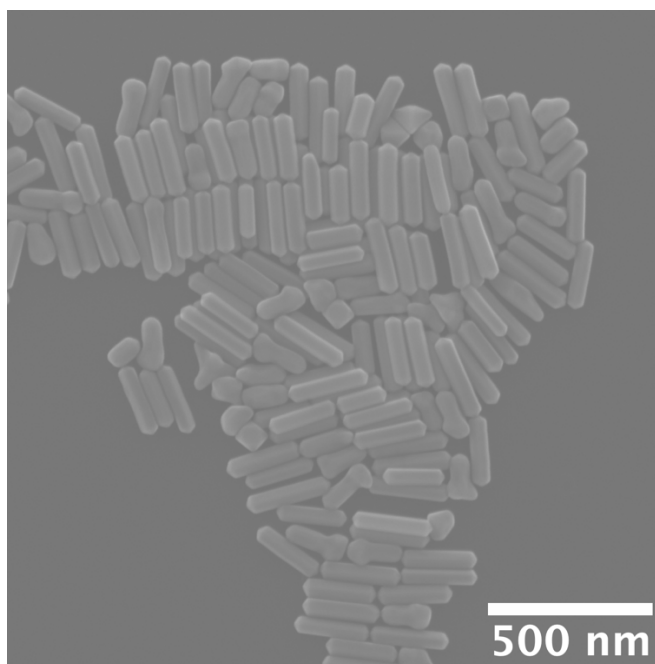

**Figure S4.** SEM image of overgrowth products from small pentatwinned nanorods prepared without L-GSH.

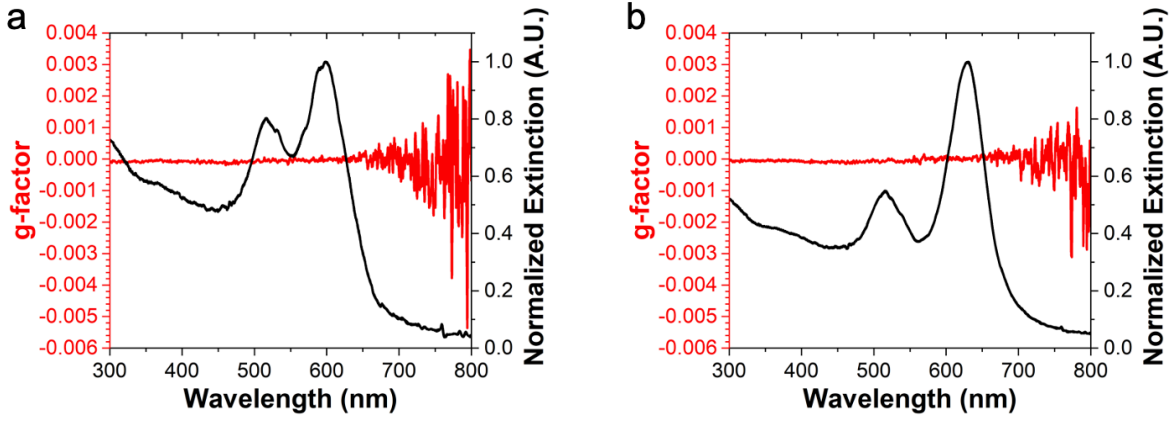

Figure S5. Optical spectra of small pentatwinned nanorod seeds in **Figure 5a-b** respectively.
